# Serum anti-Müllerian hormone and FSH: prediction of live birth and extremes of response in stimulated cycles—implications for individualization of therapy

Scott M. Nelson<sup>1,3</sup>, Robin W. Yates<sup>2</sup> and Richard Fleming<sup>1</sup>

<sup>1</sup>Reproductive and Maternal Medicine, Division of Developmental Medicine, University of Glasgow, 10 Alexandra Parade, Glasgow G31 2ER, UK; <sup>2</sup>Assisted Conception Unit, Glasgow Royal Infirmary, Glasgow G31 2ER, UK

<sup>3</sup>Correspondence address. Tel: +44 141 211 4706; Fax: +44 141 552 0873; E-mail: s.nelson@clinmed.gla.ac.uk

**BACKGROUND:** Serum concentrations of anti-Müllerian hormone (AMH) correlate with oocyte yield in assisted reproduction treatment (ART) cycles, however, performance of AMH for prediction of live birth is unknown. **METHODS:** A total of 340 first cycle IVF/ICSI patients (median age 34.0 years, inter-quartile range 31.0–37.0 years), had basal plasma AMH and FSH measured and their predictive values for live birth and oocyte yield compared. **RESULTS:** AMH predicts live birth [contribution to variance (CTV) 3.84%,  $P < 0.001$ ] and oocyte yield ( $r = 0.71$ ,  $P < 0.0001$ , CTV 7.3%,  $P < 0.0001$ ). Compared with age and FSH, AMH performs better in prediction of live births [area under receiver operating characteristic curve (AUC) 0.62, 95% CI 0.55–0.68; FSH AUC 0.42, 95% CI 0.35–0.49; age AUC 0.48, 95% CI 0.41–0.55,  $P = 0.0028$ ] and excessive response to ovarian stimulation (AMH AUC 0.90, 95% CI 0.83–0.96; FSH AUC 0.32, 95% CI 0.23–0.40; age AUC 0.57, 95% CI 0.43–0.71,  $P < 0.001$ ). AMH prediction of oocyte yield is independent of age ( $r = -0.28$ ,  $P < 0.0001$ , CTV 1.4%,  $P = 0.006$ ), however, a significant negative interaction (CTV 3.6%,  $P < 0.0001$ ) exists. AMH demonstrates improved differential distributions for non-, poor, normal and excessive ovarian responses relative to FSH and age. **CONCLUSIONS:** Plasma AMH is a superior predictor of live birth and anticipated oocyte yield compared with FSH and age, facilitating individualization of therapy prior to first ART cycle.

**Keywords:** anti-Müllerian hormone; live birth; controlled ovarian stimulation

## Introduction

There has been increasing interest in identification and the relative performance of tests of ovarian reserve prior to embarking on controlled ovarian stimulation (Broekmans *et al.*, 2006). Although there is a clear relationship between age and declining reproductive capacity (Templeton *et al.*, 1996), this is highly variable (de Bruin *et al.*, 2004) and therefore a variety of endocrine, stimulatory and ultrasound tests have been suggested as functional assessments of potential oocyte yield and pregnancy (Broekmans *et al.*, 2006). The overall aim of these tests is to provide a more accurate estimate of potential success for patients before embarking on therapy and, more importantly, to facilitate optimization and individualization of therapy prior to commencement of the first cycle of assisted reproduction treatment (ART) (Tarlantzis *et al.*, 2003). It is important for a clinic programme to be able to predict both extremes of response, as high responding patients are at risk of ovarian hyperstimulation syndrome, while poor responders can be forewarned, and modified stimulation approaches employed. A reliable indicator of responses to conventional

treatment can be used to prospectively test different therapeutic approaches.

Anti-Müllerian hormone (AMH, Müllerian-inhibiting substance), a member of the transforming growth factor- $\beta$  family, has the primary role of regression of the Müllerian duct in the male fetus during early testis differentiation. However, expression of AMH persists after completion of reproductive duct system development in males, and commences in females in early fetal life, where it is produced by ovarian granulosa cells (Modi *et al.*, 2006). In females, AMH appears to have inhibitory effects upon the recruitment of primordial follicles (Durlinger *et al.*, 2002) and it may decrease the sensitivity of large pre-antral and small antral follicles to FSH (Durlinger *et al.*, 2001). However, recent analyses of human follicles examining AMH receptor expression suggests that inhibitory effects at the earliest stages of follicle development are unlikely (Rice *et al.*, 2007). Although AMH is initially observed in granulosa cells of primary follicles, maximal expression occurs in pre-antral and small antral follicles (Laven *et al.*, 2004; Weenen *et al.*, 2004). AMH expression declines as antral

follicles increase in size, with nominal expression restricted to the granulosa cells of the cumulus (Weenen *et al.*, 2004). This loss of AMH expression during the FSH-dependent final stages of follicular growth, and the lack of expression by atretic follicles (Baarends *et al.*, 1995), suggests that basal levels of AMH may more accurately reflect the total developing follicular cohort and consequently potential ovarian response to FSH. Furthermore, AMH has been shown to not fluctuate across the menstrual cycle (Cook *et al.*, 2000; La Marca *et al.*, 2004,2006), consistent with its role reflecting the continuous, non-cyclic growth of small follicles in the ovary.

In harmony with the established relationship between age and declining ovarian reserve, AMH falls linearly with increasing age (de Vet *et al.*, 2002; Fleming *et al.*, 2006). This occurs in conjunction with reductions in the antral follicular count, which is strongly correlated to plasma AMH levels (van Rooij *et al.*, 2002; Fanchin *et al.*, 2003). AMH has consequently been explored as a predictor of ovarian response to FSH in cycles of ART (van Rooij *et al.*, 2002; Fanchin *et al.*, 2003; Hazout *et al.*, 2004; Muttukrishna *et al.*, 2004,2005; Penarrubia *et al.*, 2005) and oocyte quality (Ebner *et al.*, 2006). However, most of these studies have included relatively small series of patients ( $n = 56-141$ ). In combination with its ability to be measured throughout the menstrual cycle, AMH has been proposed as an optimal measure of 'ovarian reserve' and an accurate predictor of cycle cancellation (Muttukrishna *et al.*, 2004; Penarrubia *et al.*, 2005) or poor responder status (van Rooij *et al.*, 2002; Eldar-Geva *et al.*, 2005; Muttukrishna *et al.*, 2005; Tremellen *et al.*, 2005). Although these studies collectively demonstrate the potential value of AMH, its merits with respect to the prediction of live birth are unknown. Furthermore, clarification of its merits across the whole spectrum of ovarian response, including an excessive response, relative to the established markers of age and early follicular FSH is required. The current study, a large prospective cohort study which examines the value of AMH to predict live birth and ovarian response to controlled ovarian stimulation in a first cycle of ART in an unselected population, provides a comprehensive analysis as well as the opportunities for considering different therapeutic strategies based on basal AMH values.

## Materials and Methods

### Patients and treatment

Successive patients undergoing their first ART cycle ( $n = 340$ ) were down-regulated with a depot GnRH agonist (Prostap SR 3.75 mg, Wyeth, Maidenhead, UK) initiated on cycle day 21. Stimulation was commenced 2 weeks later, when the circulating estradiol ( $E_2$ ) was  $<100$  pg/ml (350 pmol/l), combined with a thin endometrium, and no ovarian cysts on transvaginal ultrasound scan. Ovarian stimulation was effected with exogenous gonadotrophins in the form of either Menogon (Ferring Pharmaceuticals, Langley, UK) or Gonal-F (Serono, Feltham, UK). The starting daily dose of FSH was determined by age, whereby women of  $<36$  years received 225 IU and those  $>36$  years received 300 IU each day. Ovarian follicular responses were monitored with serum  $E_2$  concentrations and transvaginal ultrasound assessment of follicular growth. The first response scan was performed on S8 (stimulation day 8), providing the 'FolsS8' value, and subsequent scans were performed according to

the S8 response. Ovulation was induced with 6500 IU HCG (Ovitrelle, Serono, Feltham, UK), provided that three follicles were  $\geq 17$  mm in diameter and serum  $E_2$  was  $\geq 200$  pg/ml. Transvaginal oocyte retrieval was performed under ultrasound guidance 38 h after HCG administration and the number of oocytes retrieved recorded. Frozen embryo transfers were performed 3 days after an LH surge.

### Assays

One month before treatment, an early follicular blood sample (cycle day 2–5) was taken for assay of FSH and AMH. The FSH concentrations in peripheral plasma were estimated using the Immulite semi-automated assay system (DPC, Los Angeles, CA, USA). Inter and intra-assay coefficients of variations were 6.5% and 6.1% respectively. Early follicular FSH concentrations were only considered valid if circulating  $E_2$  levels were  $\leq 150$  pmol/l. The AMH assay was performed in batches using the enzyme-linked immunosorbent assay provided by DSL (Webster, Texas, USA), with values presented as pmol/l (conversion factor to pmol/l = ng/ml  $\times 7.143$ ). Inter and intra-assay coefficients of variation were 5.3 and 5.4% respectively.

### Definitions

'FolsS8'—the stockpile of follicles responding to exogenous FSH was estimated by counting the number of follicles  $\geq 12$  mm, determined on the basis of previous observations that the minimum size of lead follicle at S8 was 12 mm in  $>85\%$  of cycles (Fleming *et al.*, 2006).

'No response' to FSH in ART cycles was defined as discontinuation of treatment because of negligible follicular development after 12 days of stimulation.

'Poor response' to FSH in ART cycles was defined as  $\leq 2$  oocytes obtained at retrieval, as this represented  $-2$  SDs from the mean number of oocytes collected and allowed for a 66% yield per follicle at oocyte retrieval, given the HCG criteria of three follicles  $\geq 17$  mm.

'Excess response' to FSH in ART cycles was defined as a yield of  $\geq 21$  oocytes obtained at retrieval, as this was used by our unit to dictate freezing of all embryos and no immediate replacement.

'Live birth' incorporated all births arising from the study cycle of controlled ovarian stimulation and included all live births derived from fresh and subsequent frozen embryo transfers. Embryos were only frozen if there were two embryos with a quality score of  $\geq 7$  out of 10 using a standardised scoring system (Association of Clinical Embryologists).

### Statistics

The distribution of groups of variable data was assessed, and Gaussian or non-Gaussian distributions were treated appropriately. Analysis across groups was by analysis of variance or Kruskal–Wallis as appropriate. Spearman correlation coefficients were used to assess the relationships between the parameters. FSH and AMH were logarithmically transformed for assessment in general linear models. Stepwise logistic regression was performed using an alpha of  $P \leq 0.15$  for adding or removing predictors from the model. Non-parametric receiver operating characteristic (ROC) curves were generated for FSH and AMH to compare ability of parameters to predict ovarian response and the area c (AUC) tested for equality (DeLong *et al.*, 1988). The sensitivity, specificity, percentage correctly classified and the positive and negative likelihood ratio were calculated for derived AMH cut-off values (Choi, 1998). AMH and FSH quintiles were calculated for the whole population and mean oocyte yield and live birth calculated for each quintile. The statistics packages used were Minitab v14 (Minitab®, State College, Pennsylvania, USA) and Stata v8 (StataCorp LP, College Station, Texas, USA). Significance was determined when  $P \leq 0.05$ .

**Table 1:** Patient characteristics relative to ovarian response

| Variables                         | Normal         | No HCG given     | ≤2 oocytes     | ≥21 oocytes      | P-value |
|-----------------------------------|----------------|------------------|----------------|------------------|---------|
| ART cases ( <i>n</i> )            | 262            | 34               | 19             | 25               |         |
| Age (years)                       | 34 (31.0–37.0) | 37.2 (33.8–39.8) | 34 (33.0–38.0) | 30.0 (25.5–35.0) | <0.001  |
| Duration of infertility (years)   | 3 (3–4)        | 4 (3–4)          | 4 (3–4)        | 4 (3–4)          | 0.29    |
| Treatment type: ICSI/IVF (% ICSI) | 111/151 (42.3) | 11/23 (32.4)     | 11/8 (57.8)    | 9/16 (36.0)      | 0.30    |
| BMI                               | 24.4 ± 3.2     | 25.1 ± 3.1       | 23.7 ± 3.0     | 25.2 ± 3.6       | 0.36    |
| Follicles on S8                   | 3 (1–5)        | 0 (0–1)          | 1 (0–3)        | 5 (3–8)          | 0.001   |
| Oocytes collected                 | 8.5 (5.0–12.0) | 0 (0–0)          | 2 (2–2)        | 23 (22–27.5)     | <0.001  |
| Live birth (%)                    | 30.5           | 0                | 10.5           | 44               | <0.001  |

Values are presented as median (inter-quartile range) or mean ± SD. P-value reflects analysis of variance or Kruskal–Wallis as appropriate. Follicles on S8, number of follicles ≥12 mm on stimulation day 8. ART, assisted reproduction treatment.

## Results

### Baseline patient information

Median age was 34.0 years (inter-quartile range 31.0–37.0 years), and the BMI was 24.5 ± 3.2 (mean ± SD). There was a 4 year history of infertility (inter-quartile range 3–4 years), with 142 cases (41.7%) having a male component requiring ICSI. Concentrations of FSH showed a non-Gaussian distribution with median value of 7.5 IU/l (inter-quartile range 5.9–10.0 IU/l) and a mean of 12.6 IU/l (SEM 0.28 IU/l). AMH showed a similar distribution with median 9.3 pmol/l (inter-quartile range 5.7–16.4 pmol/l) and a mean of 12.6 pmol/l (0.72 pmol/l). The overall live birth rate for the cohort was 27.4%.

Patient characteristics relative to ovarian response (Table 1) revealed the known relationship between age and response to exogenous gonadotrophins. Non-responders were older than women who had a normal ( $P < 0.01$ ) or excessive response ( $P < 0.01$ ) (Table 1). Women with an excessive response were characterized as being significantly younger ( $P < 0.01$ ). This association between age and ovarian response was reflected on stimulation day 8 with the excessive response group having a higher number of follicles ≥12 mm ( $P < 0.05$ ). Live birth rates reflected oocyte yields with the highest rates in those women with an excess response ( $P < 0.001$ ).

### AMH and FSH relative to live birth

Analysis of live birth rate relative to AMH and FSH quintiles (Fig. 1) demonstrated that although there was a significant relationship between increasing AMH and escalating live birth rate, above an AMH concentration of >7.8 pmol/l there was no discrimination in live birth rates. Similarly, for women with FSH <10.7 IU/l there was no significant differences in live birth rates. ROC analysis demonstrated that AMH [AUC 0.62, 95% confidence interval (CI) 0.55–0.68] was superior to FSH (AUC 0.42, 95% CI 0.35–0.49;  $P < 0.001$ ) or age (AUC 0.48, 95% CI 0.41–0.55) in predicting live birth.

Assessment of the independence of AMH, FSH and age to predict live birth rate was undertaken by a stepwise regression model. This revealed that AMH was the only independent predictor [ $\beta$  positive, contribution to variance (CTV) 3.84%,  $P < 0.001$ ]. Analysis of whether AMH predicted live birth independent of a correlation with oocyte yield was performed

by inclusion of oocyte yield in a second model. In this model oocyte yield ( $\beta$  positive, CTV 5.8%,  $P < 0.001$ ) was the only predictor of live birth.

### AMH and FSH relative to category of ovarian response

The relationship between oocyte yield at oocyte retrieval and baseline parameters was examined (Table 2). Consistent with previous studies, age was positively correlated with FSH, and was negatively related to AMH and oocyte yield. Increasing FSH was associated with a reduction in AMH and oocyte yield. AMH demonstrated a remarkably strong correlation to oocyte yield and appeared to be the best predictor of oocyte yield ( $r = 0.71$ ,  $P < 0.0001$ ). Analysis of the independent predictive ability of age, BMI, log FSH and log AMH in a general

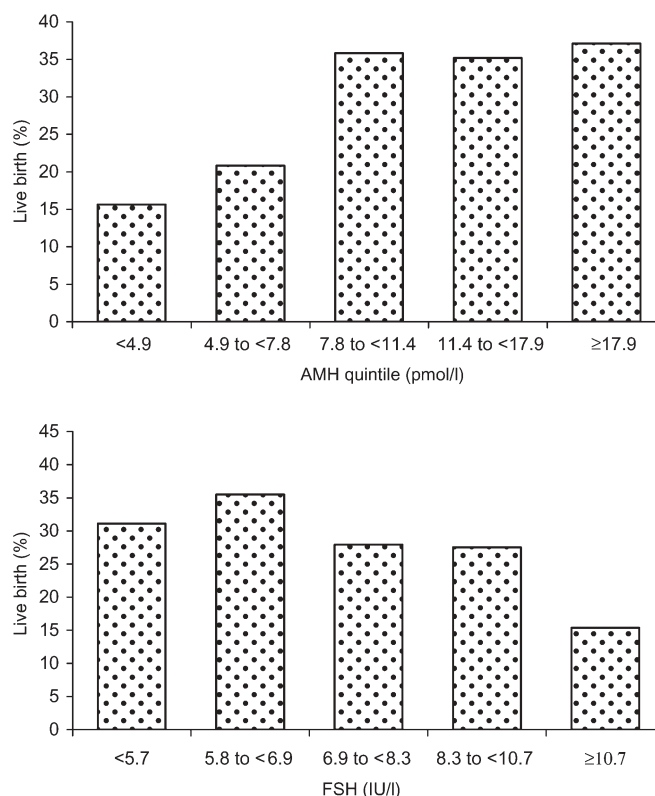

**Figure 1:** Live birth rate per AMH and FSH quintile. Values are live birth rates for all embryos derived from a single cycle, including fresh and frozen embryo transfers

**Table 2:** Spearman correlation coefficients of phenotype and endocrine markers to oocyte yield

|         | Age     | BMI   | FSH     | AMH     | Oocytes |
|---------|---------|-------|---------|---------|---------|
| Age     | –       | –0.03 | 0.23    | –0.38   | –0.28   |
| BMI     | 0.61    | –     | 0.04    | 0.06    | 0.02    |
| FSH     | <0.0001 | 0.52  | –       | –0.47   | –0.46   |
| AMH     | <0.0001 | 0.28  | <0.0001 | –       | 0.71    |
| Oocytes | <0.0001 | 0.75  | <0.0001 | <0.0001 | –       |

AMH, anti-Müllerian hormone.

linear model revealed that age (CTV 1.4%,  $P = 0.006$ ) and AMH (CTV 7.3%,  $P < 0.0001$ ) were the only independent predictors of oocyte yield, however, a significant negative interaction between age and AMH was present (CTV 3.6%,  $P < 0.0001$ ).

The baseline concentrations of FSH and AMH were examined in the four categories of responders. FSH was significantly higher in non- ( $P < 0.001$ ) and poor ( $P < 0.001$ ) responders compared with normal responders (Fig. 2). Women with an excessive response had similar FSH levels to normal responders. AMH was significantly lower in non- ( $P < 0.001$ ) and poor ( $P < 0.001$ ) responders and was higher in women who had an excessive response ( $P < 0.001$ ) (Fig. 2). AMH appeared to be a better discriminator of the four groups; however, there appeared to be significant overlap of low values of AMH in women who either had a poor, non- or normal response (Fig. 3). Consistent with the strong correlation between AMH and oocyte yield there was little overlap in women who had an excessive response (Fig. 3). A comparison of the frequency distributions of log AMH and log FSH demonstrated that each category of AMH response demonstrated greater discrimination compared with that of FSH (Fig. 3).

Formal assessment of the predictive ability of age, AMH and FSH to correctly identify women at risk of non-, poor or excessive responses was undertaken by calculating ROC curves and the AUC, 95% CI. In the ‘non-responder’ category, AMH concentrations were significantly lower than other categories, but AMH was a poorer predictor (AUC 0.073, 95% CI 0.02–0.12;  $P < 0.001$ ) than FSH (AUC 0.782, 95% CI 0.68–0.88)

or age (AUC 0.717, 95% CI 0.62–0.82), which were of equivalent efficacy ( $P = 0.32$ ). In women who had an FSH  $> 25$  ( $n = 5$ ) there was only one woman who responded and had  $\leq 2$  oocytes, and once FSH was  $\geq 30$  all women ( $n = 4$ ) were non-responders. Similar cut-offs could not be derived for age, as even at 44 years old, the oldest age within our cohort, there were cases of normal responders.

In the poor responder category, AMH appeared to be inferior (AUC 0.227, 95% CI 0.14–0.31;  $P < 0.001$ ) to FSH (AUC 0.762, 95% CI 0.64–0.88) or age (AUC 0.569, 95% CI 0.43–0.71), which again showed equivalent efficacy ( $P = 0.06$ ).

AMH performed significantly better at identifying women at risk of an excessive response to controlled ovarian stimulation (AUC 0.90, 95% CI 0.83–0.96;  $P < 0.001$ ) than FSH (AUC 0.321, 95% CI 0.23–0.40) or age (AUC 0.569, 95% CI 0.43–0.71), which were of equivalent efficacy ( $P = 0.44$ ).

ROC performance can be driven by extreme values, as evident by inclusion of women in this prospective cohort with FSH  $> 30$ . Therefore, analysis of oocyte yield relative to AMH and FSH quintiles (Fig. 4) demonstrated that although there was a relationship between increasing FSH and declining oocyte yield, this compared poorly to the predictive ability of AMH.

Further analysis of AMH with determination of pragmatic clinical cut-offs;  $< 1.0$ , 1 to  $< 5.0$ , 5.0 to  $< 15$ , 15 to  $< 25$  and  $\geq 25$  pmol/l, demonstrated that in the 23 women who had an AMH of  $< 1.0$  pmol/l, 19 women did not receive HCG, 1 woman had a poor response and 3 women responded normally as per our criteria, although only 3 oocytes were retrieved in each case. When AMH was 1.0 to  $< 5.0$  pmol/l, 17 women out of 41 (41%) were either non- or poor responders, with a median of 4 oocyte (inter-quartile range 3.0–7.75) in normal responders. For identification of women at risk of an excessive response, an AMH  $\geq 15$  pmol/l had 88.0% sensitivity and 76.9% specificity, 77.8% women were identified correctly, positive likelihood ratio 3.8 and a negative likelihood ratio of 0.15. If AMH was  $\geq 25$  pmol/l this had a lower sensitivity of 60%, 94.9% specificity, 92.2% women were correctly identified, positive likelihood ratio 11.8 and a negative

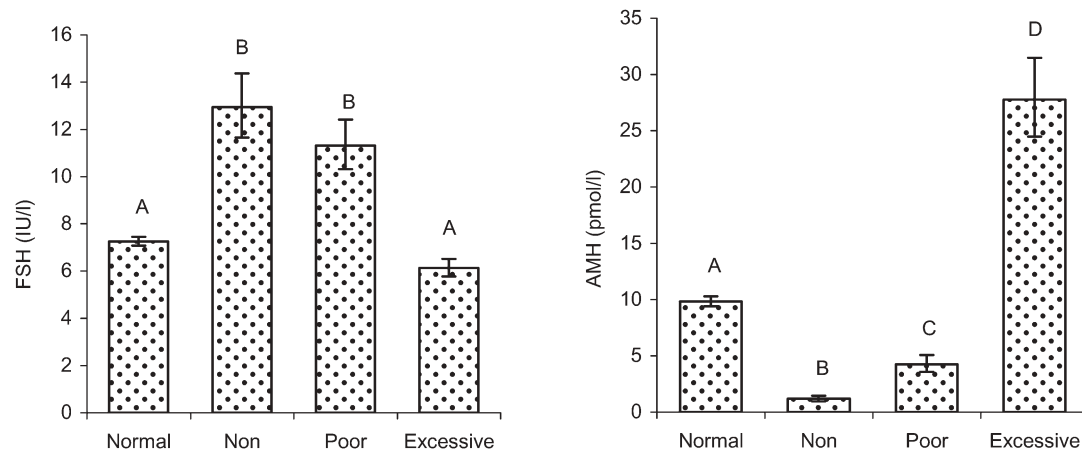**Figure 2:** FSH and AMH concentrations relative to category of ovarian response

Values are geometric mean  $\pm$  SEM of geometric mean. Groups with a letter in common do not differ significantly at  $P < 0.01$

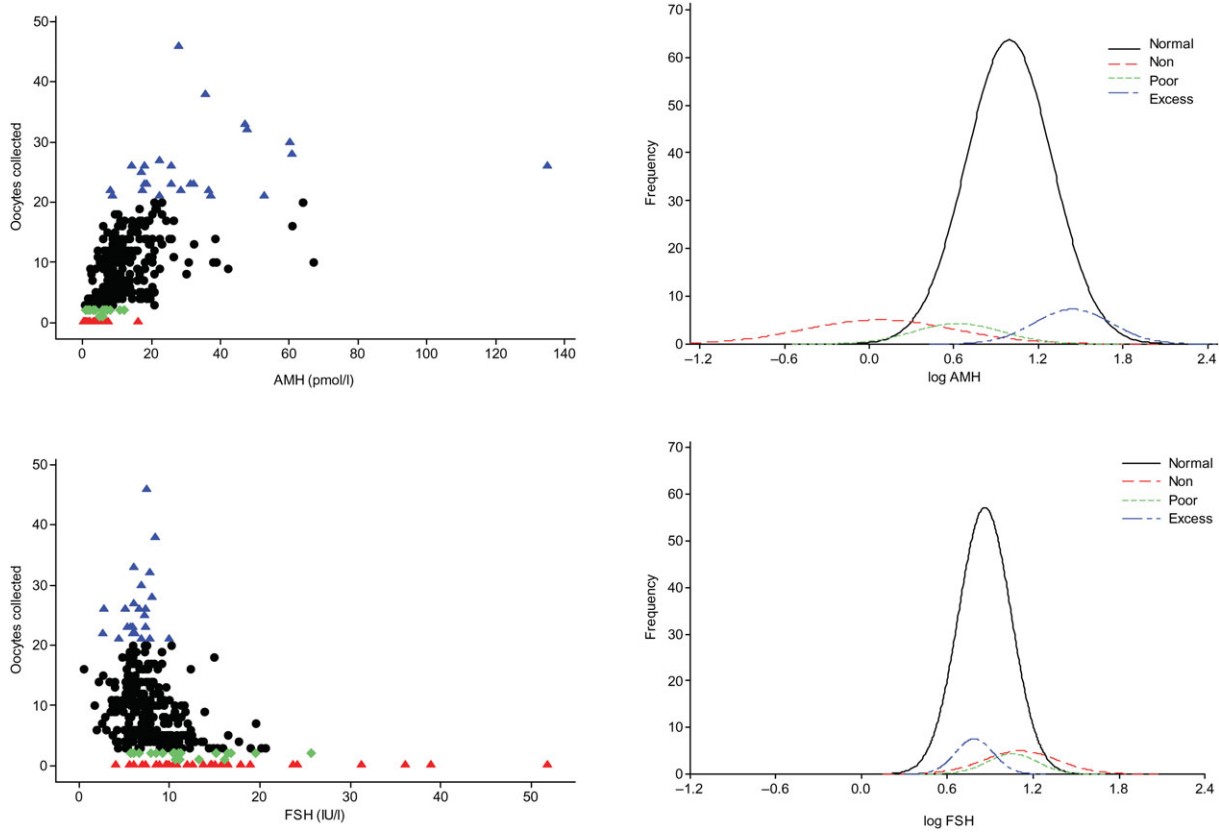

**Figure 3:** AMH and FSH related to oocyte yield and log distributions for each category of ovarian response  
 Key: red triangles, cycle cancelled; green diamonds,  $\leq 2$  oocytes retrieved; black circles,  $\geq 3$  but  $\leq 20$  oocytes and blue triangles,  $\geq 21$  oocytes.

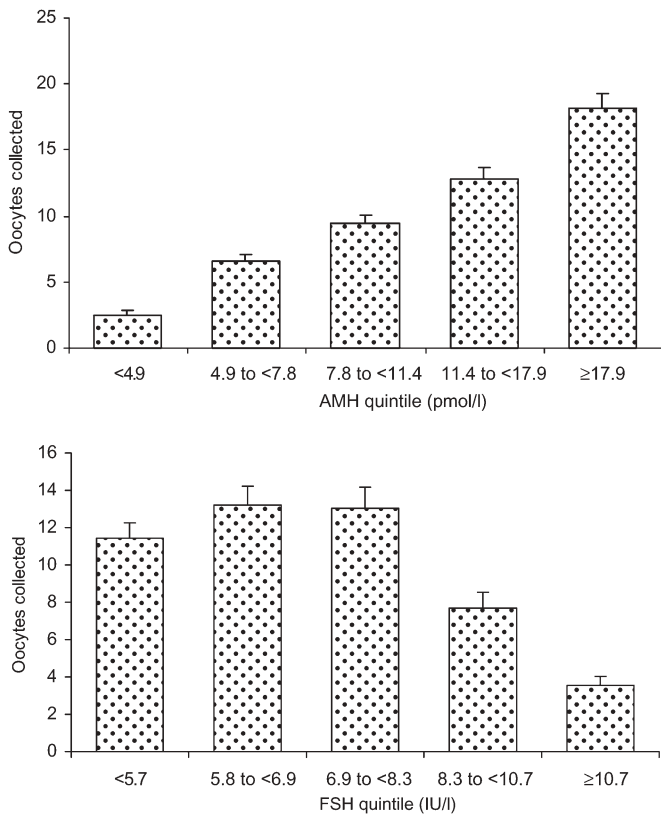

**Figure 4:** Mean oocyte yield per AMH and FSH quintile  
 Values are mean  $\pm$  SEM

likelihood ratio of 0.42. Using this upper limit of 25 pmol/l AMH, even in women who were not classed as having an excessive response by our definition, a median of 13 oocytes (inter-quartile range 10–14) were collected.

**Discussion**

In this study, we demonstrate that plasma AMH is strongly correlated to oocyte yield and is an accurate predictor of live birth and risk of an excessive response to controlled ovarian stimulation. This, the largest cohort to date of an unselected population of patients undergoing their first treatment cycle, extends previous observations regarding pregnancy rates (Eldar-Geva *et al.*, 2005) to actual live births and supports previous observations that AMH is a reliable marker of the number of follicles attaining FSH sensitivity (Seifer *et al.*, 2002; van Rooij *et al.*, 2002; Laven *et al.*, 2004). AMH is thereby a strong predictor of the number of viable antral follicles and oocyte yield in ART cycles stimulated with FSH in controlled ovarian stimulation.

The relationship between increasing AMH and live birth probably reflects the strong correlation between AMH and oocyte yield, as AMH was not an independent predictor of live birth after incorporation of oocyte yield into our models. High AMH has been associated with improved pregnancy rates (Eldar-Geva *et al.*, 2005), consistent with a correlation with numbers of mature oocytes and subsequently embryos (Hazout *et al.*, 2004) available for transfer. The observation

that AMH does not predict live birth independent of oocyte yield indicates that AMH does not predict oocyte or embryo quality (Smeenk *et al.*, 2007). Increasing FSH (Frazier *et al.*, 2004; Abdalla *et al.*, 2006) and age (Frazier *et al.*, 2004) have previously been shown to be negative predictors of live birth, however, our ROC analysis suggests that these are inferior predictors relative to AMH, reflecting the relative correlations to oocyte yield—the principal determinant of live birth.

The ability of AMH to identify women at risk of an excessive response may reflect the relative contribution from the different follicle classes to final plasma levels and their potential recruitment. Ovarian AMH expression is minimal in primordial follicles but increases in association with follicular development and expression is maximal in pre-antral follicles (Weenen *et al.*, 2004). In conditions where pre-antral follicle numbers are increased, such as polycystic ovary syndrome (PCOS) (Hughesdon, 1982), AMH plasma levels are elevated (Laven *et al.*, 2004; Fleming *et al.*, 2005; Piltonen *et al.*, 2005). Consistent with our described relationship between increased AMH and excessive response to controlled ovarian stimulation, women with PCOS are at substantial risk of excess ovarian responses and development of ovarian hyperstimulation syndrome (OHSS) (Delvigne *et al.*, 2002). Improved discrimination of women at risk of OHSS should be possible using AMH prior to controlled ovarian stimulation.

Although there is a clear association between AMH and oocyte yield, we demonstrate that AMH performs relatively poorly as a screening test for either potential cycle cancellation or poor response to controlled ovarian stimulation according to the ROC analyses. This is due to the overlap in distribution of plasma levels of AMH in women who have a potentially normal response. In women with premature ovarian failure, AMH levels are low compared with normal (Meduri *et al.*, 2007), however, plasma AMH levels are still within the detectable range in 40% of such women and within the normal range in a few patients, despite minimal to nil follicles on ovarian biopsy (Meduri *et al.*, 2007). This overlap hinders AMH as an absolute predictor of non-responder status to controlled ovarian stimulation and therefore it is not feasible to suggest that a woman should not undergo controlled ovarian stimulation based on a low plasma AMH value. This contrasts with extremely elevated FSH, where we clearly demonstrate that the risk of cancellation is high and even when undergoing oocyte retrieval, the number of oocytes obtained is very low. Consequently, adjustment of a patient's expectations is required and consideration given to individualization of a therapeutic strategy.

Ovarian reserve is currently defined as the number and quality of the follicles left in the ovary at any given time, and the values of tests for 'ovarian reserve' (meaning the number of recruitable follicles) prior to ovarian stimulation, particularly if it is maximal has recently been questioned (Broekmans *et al.*, 2006). Most of the follicles in the ovary will be primordial, and although AMH is not thought to be expressed in human primordial follicles (Weenen *et al.*, 2004), there is a strong correlation between AMH and primordial follicle number in mice (Kevenaar *et al.*, 2006), consistent with a role for AMH as a measure of ovarian reserve. However, this role is dependent upon a close relationship between the

stockpile of primordial follicles and the number of developing follicles. In fact, not all primordial follicles will successfully make the transition to primary follicles, and age has profound effects on rates of follicular growth and atresia dynamics (Faddy, 2000). Consequently it is not until this transition has occurred and a potentially FSH recruitable primary follicle has developed that AMH starts to be expressed in significant amounts, thereby potentially explaining why age is a poorer correlate than AMH of the number of oocytes obtained after controlled ovarian stimulation. The observed independence of age and AMH in predicting oocyte response may reflect their individual contributions to the process of follicular growth dynamics, with age influencing the proportion of follicles making the transition from primordial to recruitable follicles. AMH in turn may reflect the number of follicles, which successfully made the transition to a FSH sensitive phenotype. The negative interaction between AMH and age in response to controlled ovarian stimulation, suggests that older women with a low AMH will yield fewer oocytes than a younger woman with the same AMH. This interaction may reflect age dependent increases in apoptotic changes in granulosa cells, which occur independent of oocyte yields (Sadraie *et al.*, 2000). Furthermore, the degree of granulosa cell apoptotic damage is reflected in oocyte quality (Nakahara *et al.*, 1997a,b; Oosterhuis *et al.*, 1998). The reduction in AMH with age may therefore reflect a reduction in number of functional granulosa cells per follicle, with this relationship also underlying the association between AMH and oocyte quality (Ebner *et al.*, 2006).

The clear relationship between plasma AMH and oocyte yield may allow optimization of treatment strategies prior to the first cycle of ovarian stimulation. In women with a low AMH (e.g. <1.0 pmol/l) either cycle cancellation (~80%) or ≤2 oocytes are anticipated. For this group of women, management is difficult and perhaps the shorter regimens may result in less stress to the patient than a long course agonist cycle with 3–4 weeks intensive treatment to yield few oocytes. A variety of options have been explored as alternative concepts with at best limited success (Tarlantzis *et al.*, 2003; Garcia-Velasco *et al.*, 2005; Balasch *et al.*, 2006; Massin *et al.*, 2006). An alternative strategy for this group could be natural cycle IVF, although at present results are inconsistent (Bassil *et al.*, 1999; Feldman *et al.*, 2001; Pelinck *et al.*, 2002; Tarlantzis *et al.*, 2003; Kolibianakis *et al.*, 2004; Ziebe *et al.*, 2004; Check, 2005; Elizur *et al.*, 2005; Trokoudes *et al.*, 2005). Furthermore, patients would need to accept that a protracted treatment programme would be required and that not every cycle would result in embryo transfer. However, women who are forewarned of the likelihood of these events can begin to formulate coping strategies prior to treatment. For women with an AMH of 1 to <5 pmol/l, they are still at risk of either cycle cancellation or a poor response and therefore a protracted long course agonist cycle is likely to achieve no benefit over an antagonist regimen, which may be more appropriate. Whether a maximal gonadotrophin dose is beneficial remains to be determined, but with a category based upon AMH concentration these concepts can be explored prospectively and objectively. Although there is no evidence that antagonist regimens

are better than agonist regimens in poor responders (Akman *et al.*, 2000,2001; Copperman, 2003; Malmusi *et al.*, 2005; Marci *et al.*, 2005) and in fact may result in, on average, one fewer oocyte, they have the substantial benefit of enabling early cycle cancellation if an inadequate response is obtained. Women with an AMH of 5 to <15 pmol/l have a high probability of a normal response to a standard long course agonist regime, and we suggest that there is little current evidence to alter that strategy. Again with this categorization, the appropriate FSH dose can be explored—perhaps depending upon age. Women with an AMH of 15 to <25 pmol/l show an excessive response and we would recommend consideration of a protocol mindful of the increased risk of OHSS. This could employ a GnRH agonist regimen with a reduced dose of 150 IU FSH, depending on BMI, or an antagonist regime where the risk of OHSS may be reduced (Al-Inany *et al.*, 2006). Women with an AMH  $\geq$ 25 pmol/l show an excessive response to exogenous gonadotrophins and are at substantial risk of developing OHSS. This cohort of women should be treated with a GnRH antagonist regimen (again dose explored with respect to BMI) which has been shown to reduce the risk of OHSS (Al-Inany *et al.*, 2006).

In summary, this study demonstrates that basal plasma AMH can predict live birth rates in ART cycles stimulated with long course controlled ovarian stimulation, through its relationship with oocyte yield. AMH and age are independently related to oocyte yield and also have a significant negative interaction reflecting their relative contributions to follicular and oocyte ontogeny. We propose that clinicians can prospectively examine the concept of individualized and optimized treatment strategies based on AMH prior to the first treatment cycle. This approach will also allow adjustment of patient expectations accordingly and potentially minimize psychological and physical morbidity due to the extremes of response observed with controlled ovarian stimulation.

## Acknowledgements

This study would not have been possible without the ongoing support and clinical workload undertaken by the clinical, nursing, administration and embryology staff of the Assisted Conception Service, Glasgow Royal Infirmary. We acknowledge the expert technical help of Elaine and William McNally, and Marie McGhee who performed the AMH and FSH analyses, and confirmed the validity of the clinical database.

## References

- Abdalla H, Thum MY. Repeated testing of basal FSH levels has no predictive value for IVF outcome in women with elevated basal FSH. *Hum Reprod* 2006;**21**:171–174.
- Akman MA, Erden HF, Tosun SB, Bayazit N, Aksoy E, Bahceci M. Addition of GnRH antagonist in cycles of poor responders undergoing IVF. *Hum Reprod* 2000;**15**:2145–2147.
- Akman MA, Erden HF, Tosun SB, Bayazit N, Aksoy E, Bahceci M. Comparison of agonistic flare-up-protocol and antagonistic multiple dose protocol in ovarian stimulation of poor responders: results of a prospective randomized trial. *Hum Reprod* 2001;**16**:868–870.
- Al-Inany HG, Abou-Setta AM, Aboulghar M. Gonadotrophin-releasing hormone antagonists for assisted conception. *Cochrane Database Syst Rev* 2006;**3**:CD001750.
- Baarends WM, Uilenbroek JT, Kramer P, Hoogerbrugge JW, van Leeuwen EC, Themmen AP, Grootegoed JA. Anti-mullerian hormone and anti-mullerian hormone type II receptor messenger ribonucleic acid expression in rat ovaries during postnatal development, the estrous cycle, and gonadotropin-induced follicle growth. *Endocrinology* 1995;**136**:4951–4962.
- Balasz J, Fabregues F, Penarrubia J, Carmona F, Casamitjana R, Creus M, Manau D, Casals G, Vanrell JA. Pretreatment with transdermal testosterone may improve ovarian response to gonadotrophins in poor-responder IVF patients with normal basal concentrations of FSH. *Hum Reprod* 2006;**21**:1884–1893.
- Bassil S, Godin PA, Donnez J. Outcome of in-vitro fertilization through natural cycles in poor responders. *Hum Reprod* 1999;**14**:1262–1265.
- Broekmans FJ, Kwee J, Hendriks DJ, Mol BW, Lambalk CB. A systematic review of tests predicting ovarian reserve and IVF outcome. *Hum Reprod Update* 2006;**12**:685–718.
- Check JH. Modified natural cycle IVF for poor responders. *Hum Reprod* 2005;**20**:2661.
- Choi BCK. Slopes of a receiver operating characteristic curve and likelihood ratios for a diagnostic test. *Am J Epidemiol* 1998;**148**:1127–1132.
- Cook CL, Siow Y, Taylor S, Fallat ME. Serum mullerian-inhibiting substance levels during normal menstrual cycles. *Fertil Steril* 2000;**73**:859–861.
- Copperman AB. Antagonists in poor-responder patients. *Fertil Steril* 2003;**80**(Suppl 1):S16–S24. discussion S32–4.
- de Bruin JP, te Velde ER. Female reproductive ageing: concepts and consequences. In: Tulandi T, Gosden RG (eds). *Preservation of Fertility*. London: Taylor & Francis, 2004.
- de Vet A, Laven JS, de Jong FH, Themmen AP, Fauser BC. Antimullerian hormone serum levels: a putative marker for ovarian aging. *Fertil Steril* 2002;**77**:357–362.
- DeLong ER, DeLong DM, Clarke-Pearson DL. Comparing the areas under two or more correlated receiver operating characteristic curves: a nonparametric approach. *Biometrics* 1988;**44**:837–845.
- Delvigne A, Rozenberg S. Epidemiology and prevention of ovarian hyperstimulation syndrome (OHSS): a review. *Hum Reprod Update* 2002;**8**:559–577.
- Durlinger ALL, Grijters MJG, Kramer P, Karels B, Ingraham HA, Nachtigal MW, Uilenbroek JJJ, Grootegoed JA, Themmen APN. Anti-Mullerian hormone inhibits initiation of primordial follicle growth in the mouse ovary. *Endocrinology* 2002;**143**:1076–1084.
- Durlinger ALL, Grijters MJG, Kramer P, Karels B, Kumar TR, Matzuk MM, Rose UM, de Jong FH, Uilenbroek JJJ, Grootegoed JA *et al.* Anti-Mullerian hormone attenuates the effects of fsh on follicle development in the mouse ovary. *Endocrinology* 2001;**142**:4891–4899.
- Ebner T, Sommergruber M, Moser M, Shebl O, Schreier-Lechner E, Tews G. Basal level of anti-Mullerian hormone is associated with oocyte quality in stimulated cycles. *Hum Reprod* 2006;**21**:2022–2026.
- Eldar-Geva T, Ben-Chetrit A, Spitz IM, Rabinowitz R, Markowitz E, Mimoni T, Gal M, Zylber-Haran E, Margalioth EJ. Dynamic assays of inhibin B, anti-Mullerian hormone and estradiol following FSH stimulation and ovarian ultrasonography as predictors of IVF outcome. *Hum Reprod* 2005;**20**:3178–3183.
- Elizur SE, Aslan D, Shulman A, Weisz B, Bider D, Dor J. Modified natural cycle using GnRH antagonist can be an optional treatment in poor responders undergoing IVF. *J Assist Reprod Genet* 2005;**22**:75–79.
- Faddy MJ. Follicle dynamics during ovarian ageing. *Mol Cell Endocrinol* 2000;**163**:43–48.
- Fanchin R, Schonauer LM, Righini C, Guibourdenche J, Frydman R, Taieb J. Serum anti-Mullerian hormone is more strongly related to ovarian follicular status than serum inhibin B, estradiol, FSH and LH on day 3. *Hum Reprod* 2003;**18**:323–327.
- Feldman B, Seidman DS, Levron J, Bider D, Shulman A, Shine S, Dor J. In vitro fertilization following natural cycles in poor responders. *Gynecol Endocrinol* 2001;**15**:328–334.
- Fleming R, Deshpande N, Traynor I, Yates RW. Dynamics of FSH-induced follicular growth in subfertile women: relationship with age, insulin resistance, oocyte yield and anti-Mullerian hormone. *Hum Reprod* 2006;**21**:1436–1441.
- Fleming R, Harborne L, MacLaughlin DT, Ling D, Norman J, Sattar N, Seifer DB. Metformin reduces serum mullerian-inhibiting substance levels in women with polycystic ovary syndrome after protracted treatment. *Fertil Steril* 2005;**83**:130–136.
- Frazier LM, Grainger DA, Schieve LA, Toner JP. Follicle-stimulating hormone and estradiol levels independently predict the success of assisted reproductive technology treatment. *Fertil Steril* 2004;**82**:834–840.

- Garcia-Velasco JA, Moreno L, Pacheco A, Guillen A, Duque L, Requena A, Pellicer A. The aromatase inhibitor letrozole increases the concentration of intraovarian androgens and improves in vitro fertilization outcome in low responder patients: A pilot study. *Fertil Steril* 2005;**84**:82–87.
- Hazout A, Bouchard P, Seifer DB, Aussage P, Junca AM, Cohen-Bacrie P. Serum antimüllerian hormone/müllerian-inhibiting substance appears to be a more discriminatory marker of assisted reproductive technology outcome than follicle-stimulating hormone, inhibin B, or estradiol. *Fertil Steril* 2004;**82**:1323–1329.
- Hughesdon PE. Morphology and morphogenesis of the Stein-Leventhal ovary and of so-called hyperthecosis. *Obstet Gynecol Surv* 1982;**37**:59–77.
- Kevenaar ME, Meerasahib MF, Kramer P, van de Lang-Born BMN, de Jong FH, Groome NP, Themmen APN, Visser JA. Serum Anti-Müllerian hormone levels reflect the size of the primordial follicle pool in mice. *Endocrinology* 2006;**147**:3228–3234.
- Kolibianakis E, Zikopoulos K, Camus M, Tournaye H, Van Steirteghem A, Devroey P. Modified natural cycle for IVF does not offer a realistic chance of parenthood in poor responders with high day 3 FSH levels, as a last resort prior to oocyte donation. *Hum Reprod* 2004;**19**:2545–2549.
- La Marca A, Malmusi S, Giulini S, Tamaro LF, Orvieto R, Levratti P, Volpe A. Anti-Müllerian hormone plasma levels in spontaneous menstrual cycle and during treatment with FSH to induce ovulation. *Hum Reprod* 2004;**19**:2738–2741.
- La Marca A, Stabile G, Arsenio AC, Volpe A. Serum anti-Müllerian hormone throughout the human menstrual cycle. *Hum Reprod* 2006;**21**:3103–3107.
- Laven JS, Mulders AG, Visser JA, Themmen AP, De Jong FH, Fauser BC. Anti-Müllerian hormone serum concentrations in normoovulatory and anovulatory women of reproductive age. *J Clin Endocrinol Metab* 2004;**89**:318–323.
- Malmusi S, La Marca A, Giulini S, Xella S, Tagliasacchi D, Marsella T, Volpe A. Comparison of a gonadotropin-releasing hormone (GnRH) antagonist and GnRH agonist flare-up regimen in poor responders undergoing ovarian stimulation. *Fertil Steril* 2005;**84**:402–406.
- Marci R, Caserta D, Dolo V, Tatone C, Pavan A, Moscarini M. GnRH antagonist in IVF poor-responder patients: results of a randomized trial. *Reprod Biomed Online* 2005;**11**:189–193.
- Massin N, Cedrin-Durnerin I, Coussieu C, Galey-Fontaine J, Wolf JP, Hugues JN. Effects of transdermal testosterone application on the ovarian response to FSH in poor responders undergoing assisted reproduction technique—a prospective, randomized, double-blind study. *Hum Reprod* 2006;**21**:1204–1211.
- Meduri G, Massin N, Guibourdenche J, Bachelot A, Fiori O, Kuttann F, Misrahi M, Touraine P. Serum anti-Müllerian hormone expression in women with premature ovarian failure. *Hum Reprod* 2007;**22**:117–123.
- Modi D, Bhartiya D, Puri C. Developmental expression and cellular distribution of Müllerian inhibiting substance in the primate ovary. *Reproduction* 2006;**132**:443–453.
- Muttukrishna S, McGarrigle H, Wakim R, Khadum I, Ranieri DM, Serhal P. Antral follicle count, anti-müllerian hormone and inhibin B: predictors of ovarian response in assisted reproductive technology? *Bjog* 2005;**112**:1384–1390.
- Muttukrishna S, Suharjono H, McGarrigle H, Sathanandan M. Inhibin B and anti-Müllerian hormone: markers of ovarian response in IVF/ICSI patients? *Bjog* 2004;**111**:1248–1253.
- Nakahara K, Saito H, Saito T, Ito M, Ohta N, Sakai N, Tezuka N, Hiroi M, Watanabe H. Incidence of apoptotic bodies in membrana granulosa of the patients participating in an in vitro fertilization program. *Fertil Steril* 1997a;**67**:302–308.
- Nakahara K, Saito H, Saito T, Ito M, Ohta N, Takahashi T, Hiroi M. The incidence of apoptotic bodies in membrana granulosa can predict prognosis of ova from patients participating in in vitro fertilization programs. *Fertil Steril* 1997b;**68**:312–317.
- Oosterhuis GJ, Michgelsen HW, Lambalk CB, Schoemaker J, Vermes I. Apoptotic cell death in human granulosa-lutein cells: a possible indicator of in vitro fertilization outcome. *Fertil Steril* 1998;**70**:747–749.
- Pelinc MJ, Hoek A, Simons AH, Heineman MJ. Efficacy of natural cycle IVF: a review of the literature. *Hum Reprod Update* 2002;**8**:129–139.
- Penarrubia J, Fabregues F, Manau D, Creus M, Casals G, Casamitjana R, Carmona F, Vanrell JA, Balasch J. Basal and stimulation day 5 anti-Müllerian hormone serum concentrations as predictors of ovarian response and pregnancy in assisted reproductive technology cycles stimulated with gonadotropin-releasing hormone agonist–gonadotropin treatment. *Hum Reprod* 2005;**20**:915–922.
- Piltonen T, Morin-Papunen L, Koivunen R, Perheentupa A, Ruokonen A, Tapanainen JS. Serum anti-Müllerian hormone levels remain high until late reproductive age and decrease during metformin therapy in women with polycystic ovary syndrome. *Hum Reprod* 2005;**20**:1820–1826.
- Rice S, Ojha K, Whitehead S, Mason H. Stage-specific expression of androgen receptor, follicle-stimulating hormone receptor, and anti-Müllerian hormone type II receptor in single, isolated, human pre-antral follicles: relevance to polycystic ovaries. *J Clin Endocrinol Metab* 2007;**92**:1034–1040.
- Sadraie SH, Saito H, Kaneko T, Saito T, Hiroi M. Effects of aging on ovarian fecundity in terms of the incidence of apoptotic granulosa cells. *J Assist Reprod Genet* 2000;**17**:168–173.
- Seifer DB, MacLaughlin DT, Christian BP, Feng B, Shelden RM. Early follicular serum mullerian-inhibiting substance levels are associated with ovarian response during assisted reproductive technology cycles. *Fertil Steril* 2002;**77**:468–471.
- Smeenk MJ, Sweep FCGJ, Zielhuis GA, Kremer JAM, Thomas CMG, Braat DDM. Antimüllerian hormone predicts ovarian responsiveness, but not embryo quality or pregnancy, after in vitro fertilization or intracytoplasmic sperm injection. *Fertil Steril* 2007;**87**:223–226.
- Tarlatzis BC, Zepiridis L, Grimbizis G, Bontis J. Clinical management of low ovarian response to stimulation for IVF: a systematic review. *Hum Reprod Update* 2003;**9**:61–76.
- Templeton A, Morris JK, Parslow W. Factors that affect outcome of in-vitro fertilisation treatment. *Lancet* 1996;**348**:1402–1406.
- Tremellen KP, Kolo M, Gilmore A, Lekamge DN. Anti-müllerian hormone as a marker of ovarian reserve. *Aust N Z J Obstet Gynaecol* 2005;**45**:20–24.
- Trokoudes KM, Minbattiwalla MB, Kalogirou L, Pantelides K, Mitsingas P, Sokratous A, Chrysanthou A, Fasouliotis SJ. Controlled natural cycle IVF with antagonist use and blastocyst transfer. *Reprod Biomed Online* 2005;**11**:685–689.
- van Rooij IA, Broekmans FJ, te Velde ER, Fauser BC, Bancsi LF, de Jong FH, Themmen AP. Serum anti-Müllerian hormone levels: a novel measure of ovarian reserve. *Hum Reprod* 2002;**17**:3065–3071.
- Weenen C, Laven JSE, von Bergh ARM, Cranfield M, Groome NP, Visser JA, Kramer P, Fauser BCJM, Themmen APN. Anti-Müllerian hormone expression pattern in the human ovary: potential implications for initial and cyclic follicle recruitment. *Mol Hum Reprod* 2004;**10**:77–83.
- Ziebe S, Bangsboll S, Schmidt KL, Loft A, Lindhard A, Nyboe Andersen A. Embryo quality in natural versus stimulated IVF cycles. *Hum Reprod* 2004;**19**:1457–1460.

Submitted on February 14, 2007; resubmitted on June 6, 2007; accepted on June 13, 2007
